# Supplementary material for: The importance of solvent quality on the modification of conjugated polymer conformation and thermodynamics with illumination
Source: Royal Society of Chemistry journal article supplement (doi:10.1039/c6sm02631a), 2017-01-01
Supplement: c6sm02631a1.pdf [file c6sm02631a1.pdf]

### Supplementary Information

**Table S1:** Scattering length density values for experimental components

| Material               | SLD ( $\text{\AA}^{-2}$ ) |
|------------------------|---------------------------|
| P3HT                   | $6.76 \times 10^{-7}$     |
| MEH-PPV                | $9.95 \times 10^{-7}$     |
| d-styrene              | $5.2 \times 10^{-6}$      |
| d-orthodichlorobenzene | $4.59 \times 10^{-6}$     |
| d-bromobenzene         | $1.65 \times 10^{-6}$     |
| d-tetrahydrofuran      | $6.35 \times 10^{-6}$     |
| d-cyclohexane          | $5.85 \times 10^{-6}$     |

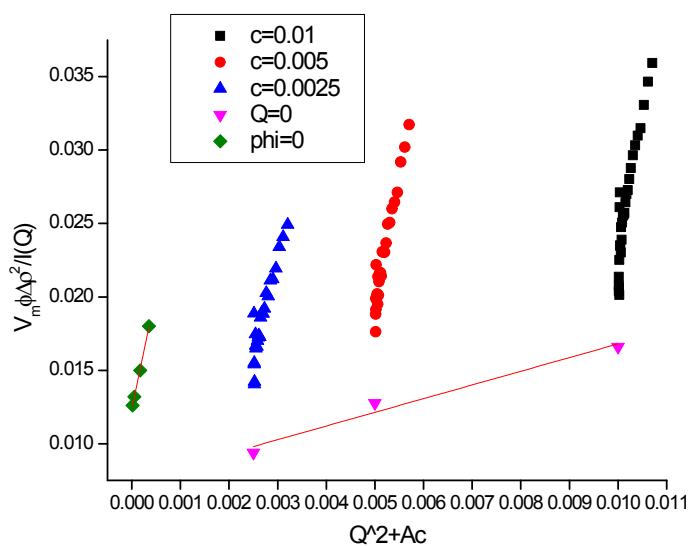

**Figure S1:** Example Zimm Plot analysis for 1, 0.5, and 0.25 wt% P3HT in d-ODCB.
